# Supplementary material for: Asthma in Competitive Cross-Country Skiers: A Systematic Review and Meta-analysis
Source: PubMed Central journal article supplement (PMC7575483; doi:10.1007/s40279-020-01334-4), 2020-09-11
Supplement: 40279_2020_1334_MOESM2_ESM.pdf [file 40279_2020_1334_MOESM2_ESM.pdf]

**Asthma in competitive cross-country skiers – A systematic review and meta-analysis**  
Sports Medicine

Mäki-Heikkilä, Rikhard (1), Karjalainen, Jussi (1,2), Parkkari, Jari (3), Valtonen, Maarit (4), Lehtimäki, Lauri (1,2)  
(1) Faculty of Medicine and Health Technology, Tampere University, Tampere, Finland; (2) Allergy Centre, Tampere University Hospital, Tampere, Finland; (3) Tampere Research Center of Sports Medicine, UKK Institute, Tampere, Finland; (4) KIHU – Research Institute for Olympic Sports, Jyväskylä, Finland  
Corresponding author: Lauri Lehtimäki, lauri.lehtimaki@tuni.fi

**Supplemental file 2: Risk of bias assessments**

**Risk of bias**

**LOW MODERATE HIGH VERY HIGH TOTAL**  
18 10 3 2 33

| Study                | year published | Title                                                                                                                                                          | Randomisation sequence generation: was the allocation sequence adequately generated? OR were subjects recruited properly?                                               | Treatment allocation concealment: was the allocated treatment adequately concealed from study participants and clinicians and other healthcare or research staff at the enrolment stage? | Blinding: were the personnel assessing outcomes and analysing data sufficiently blinded to the intervention allocation throughout the trial? | Completeness of outcome data: were participant exclusions, attrition and incomplete outcome data adequately addressed in the published report? | Selective outcome reporting: is there evidence of selective outcome reporting and might this have affected the study results?                                             | Other sources of bias: was the trial apparently free of any other problems that could produce a high risk of bias?                                                                | Overall bias: low, moderate, high, excluded                                                                                                         | 18 | 10 | 3 | 2 | 33 |
|----------------------|----------------|----------------------------------------------------------------------------------------------------------------------------------------------------------------|-------------------------------------------------------------------------------------------------------------------------------------------------------------------------|------------------------------------------------------------------------------------------------------------------------------------------------------------------------------------------|----------------------------------------------------------------------------------------------------------------------------------------------|------------------------------------------------------------------------------------------------------------------------------------------------|---------------------------------------------------------------------------------------------------------------------------------------------------------------------------|-----------------------------------------------------------------------------------------------------------------------------------------------------------------------------------|-----------------------------------------------------------------------------------------------------------------------------------------------------|----|----|---|---|----|
| Larsson et al. 1993  | 1993           | High prevalence of asthma in cross country skiers                                                                                                              | Recruiting by invitation from ski clubs in Sweden                                                                                                                       | cross-sectional study                                                                                                                                                                    | no blinding                                                                                                                                  | 42/47 of the invited participated.                                                                                                             | no evidence                                                                                                                                                               | Skiers with ICS medication did not discontinue their medication for tests. Unidentical methacholine test protocols in study centers.                                              | Moderate. Representativeness of subject to whole skier population and recruitment methods. Different methacholine challenge in different locations. |    |    | 1 |   |    |
| Larsson et al. 1994  | 1994           | Self-reported obstructive airway symptoms are common in young cross-country skiers                                                                             | no randomisation in skiers, but almost the best skiers included. controls selected from same schools as skiers                                                          | not applicable, cross-sectional study                                                                                                                                                    | no blinding                                                                                                                                  | Response rate high: 98 % in skiers, 90 % controls                                                                                              | The aim of the study was to estimate the prevalence of self-reported airway symptoms and asthma as well as the use of anti-asthmatic medication. Results clearly reported | no evidence                                                                                                                                                                       | Low                                                                                                                                                 | 1  |    |   |   |    |
| Heir and Oseid 1994  | 1994           | Self-reported asthma and exercise-induced asthma symptoms in high-level competitive cross-country skiers                                                       | no randomisation in skiers, but almost the best skiers included. controls selected to match skiers' demography                                                          | not applicable, cross-sectional study                                                                                                                                                    | no blinding                                                                                                                                  | Response rate very high: 100 % in skiers, 79 % controls                                                                                        | Aim of the study was prevalence of asthma and results clearly stated                                                                                                      | no evidence                                                                                                                                                                       | Low                                                                                                                                                 | 1  |    |   |   |    |
| Sue-Chu et al. 1996  | 1996           | Prevalence of asthma in young cross-country skiers in central Scandinavia: Differences between Norway and Sweden                                               | No randomisation. Not clear if all skiers eligible in the region were invited                                                                                           | observational study, no treatment allocated                                                                                                                                              | no blinding                                                                                                                                  | 100 % completed the study.                                                                                                                     | no evidence                                                                                                                                                               | no control group who don't participate in skiing. No information about the validity of questionnaire, validity of total prevalence of asthma, if diagnosis was self-reported      | Low                                                                                                                                                 | 1  |    |   |   |    |
| Michalak et al. 2002 | 2002           | Prevalence of asthma in athletes, influence of sport and environmental exposure (French)                                                                       | no randomisation                                                                                                                                                        | cross-sectional study                                                                                                                                                                    | no blinding                                                                                                                                  | all completed                                                                                                                                  | no evidence                                                                                                                                                               | no evidence                                                                                                                                                                       | Low.                                                                                                                                                | 1  |    |   |   |    |
| Langdeau et al. 2004 | 2004           | Comparative prevalence of asthma in different groups of athletes: a survey.                                                                                    | no randomisation, questionnaire sent to all eligible participants in Quebec area                                                                                        | not applicable, cross-sectional study                                                                                                                                                    | no blinding                                                                                                                                  | 48 % responded, percentage of responded skiers not reported. other disciplines as comparison/controls                                          | data from different disciplines mixed: only prevalence of asthma could be extracted                                                                                       | valid question pattern from ECHRS questionnaire                                                                                                                                   | Moderate. Small sample size                                                                                                                         |    | 1  |   |   |    |
| Turmel et al. 2012   | 2012           | Cardiorespiratory screening in elite endurance sports athletes - the quebec study                                                                              | no randomisation                                                                                                                                                        | screening study, no treatment allocated                                                                                                                                                  | no blinding                                                                                                                                  | 133/375 invited participated. Selection bias? number of excluded subjects not reported. criteria stated                                        | no evidence                                                                                                                                                               | Possible selection bias                                                                                                                                                           | Moderate. Possible selection bias                                                                                                                   |    | 1  |   |   |    |
| Norqvist et al. 2015 | 2015           | Self-reported physician-diagnosed asthma among swedish adolescent, adult and former elite endurance athletes                                                   | no randomisation                                                                                                                                                        | postal questionnaire, no treatment allocated                                                                                                                                             | no blinding                                                                                                                                  | response rate 82 %                                                                                                                             | no evidence                                                                                                                                                               | selection bias: those with problems respond. recall bias of onset of asthma: not likely.                                                                                          | Low.                                                                                                                                                | 1  |    |   |   |    |
| Eklund et al. 2018   | 2018           | Prevalence, age at onset, and risk factors of self-reported asthma among swedish adolescent elite cross-country skiers.                                        | no randomisation                                                                                                                                                        | postal questionnaire, no treatment allocated                                                                                                                                             | no blinding                                                                                                                                  | response rate 96 % in skiers, 48 % in controls.                                                                                                | no evidence                                                                                                                                                               | Low response rate in controls. Even if true prevalence of asthma in controls is lower, the difference is still significant.                                                       | Low.                                                                                                                                                | 1  |    |   |   |    |
| Heir 1994            | 1994           | Longitudinal variations in bronchial responsiveness in cross-country skiers and control subjects                                                               | It is not certain if all skiers and controls in conscript service were included. Skiers in conscript service are not an appropriate selection to represent elite skiers | not applicable, longitudinal study                                                                                                                                                       | no blinding                                                                                                                                  | 19/22 skiers and 22/24 controls completed, reasons clearly stated                                                                              | BHR variation investigated and it is reported clearly.                                                                                                                    | Methacholine cutoff criteria different from current protocol (PC10 dose, FEV1 fall ≥ 10 %)                                                                                        | Moderate. Representativeness of the subjects as elite skiers                                                                                        |    | 1  |   |   |    |
| Heir and Larsen 1995 | 1995           | The influence of training intensity, airway infections and environmental conditions on seasonal variations in bronchial responsiveness in cross-country skiers | No randomisation. Same cohort as Heir et al. 1995                                                                                                                       | observational study, no treatment allocated                                                                                                                                              | no blinding                                                                                                                                  | All subjects completed the study.                                                                                                              | no evidence                                                                                                                                                               | Military service differs from general life in skiers. Effect of environment? Reliability of training diaries?                                                                     | Moderate. Reliability to conclude that highly intensive training causes BR to increase.                                                             |    | 1  |   |   |    |
| Heir et al. 1995     | 1995           | Respiratory tract infection and bronchial responsiveness in elite athletes and sedentary control subjects                                                      | No randomisation. Recruitment pool 19 skiers and 12 contracted an infection. Controls 22 and 10 contracted an infection from the same military camp.                    | observational study, no treatment allocated                                                                                                                                              | no blinding                                                                                                                                  | No participant exclusion. Aim of the study and the result clearly reported                                                                     | no evidence                                                                                                                                                               | diverse causes for infection. Cause for infection not reported in 14/22 subjects. Could the results be applied to skiers in general?                                              | Low.                                                                                                                                                | 1  |    |   |   |    |
| Sue-Chu et al. 1998  | 1998           | Lymphoid aggregates in endobronchial biopsies from young elite cross-country skiers.                                                                           | no randomisation                                                                                                                                                        | laboratory study, no treatment allocated                                                                                                                                                 | no blinding                                                                                                                                  | 100 %                                                                                                                                          | none                                                                                                                                                                      | Controls statistically significantly older (24,1 vs. 17,6 yr), effect?                                                                                                            | Low                                                                                                                                                 | 1  |    |   |   |    |
| Sandsund et al. 1998 | 1998           | Effect of cold exposure (-15°C) and Salbutamol treatment on physical performance in elite nonasthmatic cross-country skiers                                    | Test order randomised. Recruitment methods not reported                                                                                                                 | observational study, no treatment allocated                                                                                                                                              | salbutamol administration double-blinded                                                                                                     | 100 % completed the study.                                                                                                                     | aim of the study and outcomes match                                                                                                                                       | Three skiers used previously anti-asthmatic medication but exact medication or withhold period not reported. Running as the exercise modality, not skiing. Probably not relevant. | Low.                                                                                                                                                | 1  |    |   |   |    |
| Sue-Chu et al. 1999  | 1999           | Non-invasive evaluation of lower airway inflammation in hyper-responsive elite cross-country skiers and asthmatics.                                            | no randomisation                                                                                                                                                        | test study, no treatment conducted                                                                                                                                                       | no blinding                                                                                                                                  | no report of exclusion: 100 % completed the study                                                                                              | none                                                                                                                                                                      | none observed                                                                                                                                                                     | Low                                                                                                                                                 | 1  |    |   |   |    |
| Sue-Chu et al. 1999  | 1999           | Bronchoscopy and bronchoalveolar lavage findings in cross-country skiers with and without "ski asthma".                                                        | no randomisation                                                                                                                                                        | test study, no treatment conducted                                                                                                                                                       | no blinding of the sample assessment                                                                                                         | 100 %                                                                                                                                          | none                                                                                                                                                                      | sample assessment not blinded                                                                                                                                                     | Low                                                                                                                                                 | 1  |    |   |   |    |
| Sue-Chu et al. 1999  | 1999           | Salmeterol and physical performance at -15°C in highly trained nonasthmatic cross-countrv skiers                                                               | test order randomised. recruitment methods not reported                                                                                                                 | cross-over design.                                                                                                                                                                       | double-blind, block-randomised, placebo-controlled, cross-over study design                                                                  | 100 % of the subjects completed                                                                                                                | no evidence                                                                                                                                                               | Running as the exercise modality, not skiing. Probably not relevant.                                                                                                              | Low                                                                                                                                                 | 1  |    |   |   |    |

Supplemental file 2: Risk of bias assessments

Risk of bias

LOW 18 MODERATE 10 HIGH 3 VERY HIGH 2 TOTAL 33

| Study                   | year published | Title                                                                                                                                                                                | Randomisation sequence generation: was the allocation sequence adequately generated? OR were subjects recruited properly?                     | Treatment allocation concealment: was the allocated treatment adequately concealed from study participants and clinicians and other healthcare or research staff at the enrolment stage? | Blinding: were the personnel assessing outcomes and analysing data sufficiently blinded to the intervention allocation throughout the trial? | Completeness of outcome data: were participant exclusions, attrition and incomplete outcome data adequately addressed in the published report? | Selective outcome reporting: is there evidence of selective outcome reporting and might this have affected the study results? | Other sources of bias: was the trial apparently free of any other problems that could produce a high risk of bias?                                                                                 | Overall bias: low, moderate, high, excluded                                                                                                        | LOW | MODERATE | HIGH | VERY HIGH | TOTAL |
|-------------------------|----------------|--------------------------------------------------------------------------------------------------------------------------------------------------------------------------------------|-----------------------------------------------------------------------------------------------------------------------------------------------|------------------------------------------------------------------------------------------------------------------------------------------------------------------------------------------|----------------------------------------------------------------------------------------------------------------------------------------------|------------------------------------------------------------------------------------------------------------------------------------------------|-------------------------------------------------------------------------------------------------------------------------------|----------------------------------------------------------------------------------------------------------------------------------------------------------------------------------------------------|----------------------------------------------------------------------------------------------------------------------------------------------------|-----|----------|------|-----------|-------|
| Karjalainen et al. 2000 | 2000           | Evidence of airway inflammation and remodeling in ski athletes with and without bronchial hyperresponsiveness to methacholine.                                                       | no randomisation                                                                                                                              | test study, no treatment conducted                                                                                                                                                       | no                                                                                                                                           | 100%                                                                                                                                           | no evidence                                                                                                                   | asthmatic status of the skiers? Confounding factor                                                                                                                                                 | Low                                                                                                                                                | 1   |          |      |           |       |
| Sue-Chu et al. 2000     | 2000           | Placebo-controlled study of inhaled budesonide on indices of airway inflammation in bronchoalveolar lavage fluid and bronchial biopsies in cross-country skiers.                     | randomisation of treatment                                                                                                                    | treatment randomised at the beginning.                                                                                                                                                   | double-blinded drug treatment                                                                                                                | one skier withdrew from study                                                                                                                  | No evidence of selection bias                                                                                                 | two different observers analysing the BAL samples. One in Trondheim, one in Helsinki                                                                                                               | Low                                                                                                                                                |     |          | 1    |           |       |
| Wilber et al. 2000      | 2000           | Incidence of exercise-induced bronchospasm in Olympic winter sport athletes.                                                                                                         | no randomisation. initial pool of subjects from participants in Olympic trials. inclusion criteria: Olympic team 1998                         | cross-sectional study                                                                                                                                                                    | no blinding                                                                                                                                  | 3 % of the olympic team could not be tested (all disciplines, not clear which sport)                                                           | total number of subjects in the olympic team not reported.                                                                    | Selection bias                                                                                                                                                                                     | High. total number of subjects in the olympic team was not reported.                                                                               | 1   |          |      |           |       |
| Ogston and Butcher 2002 | 2002           | A Sport-Specific Protocol for Diagnosing Exercise-Induced Asthma in Cross-Country Skiers                                                                                             | no randomisation                                                                                                                              | sport-specific diagnostic test. no treatment allocated                                                                                                                                   | no blinding                                                                                                                                  | 99/101, two excluded because of acute respiratory illness                                                                                      | No evidence                                                                                                                   | none observed                                                                                                                                                                                      | Low                                                                                                                                                |     | 1        |      |           |       |
| Pohjantähti et al. 2005 | 2005           | Exercise-induced bronchospasm among healthy elite cross country skiers and non-athletic students                                                                                     | no randomisation                                                                                                                              | sport-specific diagnostic test. no treatment allocated                                                                                                                                   | no blinding                                                                                                                                  | 87 %, 3 excluded because of prior asthma diagnosis. all other subjects completed the study                                                     | no evidence                                                                                                                   | only study to use ≥ 20 % decrease in MMEF as one criteria for asthma diagnosis. EIB and asthma was diagnosed also based on changes in MMEF after exercise test, which is not a validated criterion | Moderate. MMEF is not in international diagnostic guidelines.                                                                                      | 1   |          |      |           |       |
| Stensrud et al. 2007    | 2007           | Bronchial hyperresponsiveness in skiers: field test versus methacholine provocation?                                                                                                 | no randomisation                                                                                                                              | diagnostic test, no treatment allocated                                                                                                                                                  | no blinding                                                                                                                                  | 100%                                                                                                                                           | no evidence                                                                                                                   |                                                                                                                                                                                                    | Low                                                                                                                                                |     |          | 1    |           |       |
| Sue-Chu et al. 2010     | 2010           | Airway hyperresponsiveness to methacholine, adenosine 5-monophosphate, mannitol, eucapnic voluntary hyperpnoea and field exercise challenge in elite cross-country skiers.           | test order randomised                                                                                                                         | diagnostic test, no treatment allocated                                                                                                                                                  | no blinding                                                                                                                                  | 100% for the first part, 57 % for second (2 personal reasons, 23 respiratory illness)                                                          | no evidence                                                                                                                   | GlaxoSmithKline funded the study. Some authors receive royalty for mannitol tests and own Pharmaxis stock. Pharmaxis produces Aridol which may have been used but not mentioned                    | Moderate                                                                                                                                           | 1   |          |      |           |       |
| Dickinson et al. 2011   | 2011           | Diagnosis of exercise-induced bronchoconstriction: eucapnic voluntary hyperpnoea challenges identify previously undiagnosed elite athletes with exercise-induced bronchoconstriction | Recruiting by invitation. Athletes with no prior bronchodilatation test or bronchoprovocation. 100 % participation rate                       | test study, no treatment conducted                                                                                                                                                       | no blinding                                                                                                                                  | 100 % completed the challenge.                                                                                                                 | Biathletes mixed with other disciplines, not all data could be extracted.                                                     | small sample size.                                                                                                                                                                                 | Low. Small sample size                                                                                                                             |     |          |      | 1         |       |
| Zebrowska et al. 2015   | 2015           | Endurance training and the risk of bronchial asthma in female cross-country skiers.                                                                                                  | no randomisation                                                                                                                              | screening study, no treatment allocated                                                                                                                                                  | no blinding                                                                                                                                  | spirometry values not shown, only percentages                                                                                                  | no results after exercise challenge. would have been possible but not reported if conducted                                   | no repeated measurements of NO <sub>2</sub> -levels. Time of day not reported (possibly after blood samples).                                                                                      | High. Selective reporting and measurement times not reported. Possible asthma medication use not reported                                          |     | 1        |      |           |       |
| Kennedy et al. 2016     | 2016           | Airway inflammation, cough and athlete quality of life in elite female cross-country skiers: A longitudinal study                                                                    | Recruiting from Canadian national and other top teams. Possible refusals of eligible athletes in recruiting process not reported. no controls | longitudinal study                                                                                                                                                                       | no blinding                                                                                                                                  | 100 % of the recruited completed the challenge.                                                                                                | 10/18 provided sputum induction samples, reason not reported                                                                  | no controls, generalization to all elite athletes, including men                                                                                                                                   | Moderate. Sputum sample exclusions not reported                                                                                                    |     |          |      |           | 1     |
| Nikitina et al. 2013    | 2013           | The interaction between respiratory function and exhaled nitric oxide in exercise-induced bronchoconstriction in sportsmen                                                           | no randomisation                                                                                                                              | test study, no treatment allocated. Exercise protocols and intensities not fully reported                                                                                                | no blinding                                                                                                                                  | number of athletes with and without EIB not reported.                                                                                          | confusing terminology: sportsmen and sportswomen. discussion only about sportsmen.                                            | number of athletes in different groups not reported. Not clear if "sportsmen" in results also concerned women                                                                                      | Very high, excluded                                                                                                                                |     |          |      |           | 1     |
| Nikitina 2014           | 2014           | Efficacy of antileukotriene therapy in exercise-induced bronchospasm in skiers and biathlonsists                                                                                     | no randomisation                                                                                                                              | only athletes with EIB after the first test received montelukast. no placebo used. protocol for testing EIB not clearly reported.                                                        | no blinding                                                                                                                                  | How many athletes did not have anymore FEV1 ≥ 10 % decrease after drug therapy? How many athletes conducted tests, 10 or 11 athletes?          | Where are athletes with no EIB after the first test? Did they do another test 10 days later?                                  | number of athletes in different groups not reported.                                                                                                                                               | Very high, excluded                                                                                                                                |     |          |      | 1         |       |
| Stang et al. 2018       | 2018           | The Role of Airway Inflammation and Bronchial Hyperresponsiveness in Athlete's Asthma.                                                                                               | no randomisation. Recruitment criteria ok                                                                                                     | no treatment conducted, cross-sectional study                                                                                                                                            | cell count calculation blinded and conducted by two investigators (not reported if individually)                                             | 21 % of the original subjects excluded due inadequate sputum sample                                                                            | no evidence                                                                                                                   | 7/20 of the asthmatic athletes used ICS. Test conducted all year round, including in the winter when the stress on the airways is maximum in skiers.                                               | Moderate                                                                                                                                           | 1   |          |      |           |       |
| Stenfors 2010           | 2010           | Self-reported symptoms and bronchial hyperresponsiveness in elite cross-country skiers                                                                                               | no randomisation                                                                                                                              | test study, no treatment conducted                                                                                                                                                       | no blinding                                                                                                                                  | 100%                                                                                                                                           | no evidence                                                                                                                   | Proportion of subjects with asthma or use of asthma medication not reported                                                                                                                        | Low. The sensitivities and specificities of the questions are not analysed separately in those with and without known asthma or asthma medication. | 1   |          |      |           |       |
| Verges et al. 2004      | 2004           | A 10-year follow-up study of pulmonary function in symptomatic elite cross-country skiers – athletes and bronchial dysfunctions                                                      | case report                                                                                                                                   | no treatment                                                                                                                                                                             | no blinding                                                                                                                                  | all cases reported                                                                                                                             | no evidence                                                                                                                   | none observed                                                                                                                                                                                      | Low                                                                                                                                                |     |          | 1    |           |       |
| Rundell et al. 2001     | 2001           | Self-reported symptoms and exercise-induced asthma in the elite athlete.                                                                                                             | no randomisation. recruitment methods not clearly reported                                                                                    | cross-sectional study                                                                                                                                                                    | no blinding                                                                                                                                  | All completed                                                                                                                                  | not all results from different sports reported. athletes regarded as one group.                                               | no evidence                                                                                                                                                                                        | Moderate. Unclear recruitment strategy. Only provides evidence from asthma-related symptoms in skiers, nothing else.                               |     |          | 1    |           |       |
