# Supplementary material for: Asthma in Competitive Cross-Country Skiers: A Systematic Review and Meta-analysis
Source: Sports Med. 2020 Sep 11;50(11):1963–81. doi: 10.1007/s40279-020-01334-4 (PMC7575483; doi:10.1007/s40279-020-01334-4)
Supplement: Supplementary file 3 — Supplementary file3 (PDF 98 kb) [file 40279_2020_1334_MOESM3_ESM.pdf]

**Asthma in competitive cross-country skiers – A systematic review and meta-analysis**  
**Sports Medicine**

Mäki-Heikkilä, Rikhard (1), Karjalainen, Jussi (1,2), Parkkari, Jari (3), Valtonen, Maarit (4), Lehtimäki, Lauri (1,2)  
 (1) Faculty of Medicine and Health Technology, Tampere University, Tampere, Finland; (2) Allergy Centre, Tampere University Hospital, Tampere, Finland; (3) Tampere Research Center of Sports Medicine, UKK Institute, Tampere, Finland; (4) KIHU – Research Institute for Olympic Sports, Jyväskylä, Finland

Corresponding author: Lauri Lehtimäki, lauri.lehtimaki@tuni.fi

**Supplemental file 3. List of articles included in full-text search**  
**Total: 163 articles, 130 articles excluded, 33 articles included in the review**

| Author and year    | Title                                                                                                                                                                               | Decision                                       |
|--------------------|-------------------------------------------------------------------------------------------------------------------------------------------------------------------------------------|------------------------------------------------|
| Accad 1997         | Dyspnea, cyanosis, and pulmonary infiltrates in a young skier.                                                                                                                      | not asthma                                     |
| Alaranta 2008      | Use of prescription drugs in athletes.                                                                                                                                              | review                                         |
| Alaranta ym. 2004  | Asthma medication in Finnish olympic athletes: no signs of inhaled beta2-agonist overuse.                                                                                           | skiers cannot be separated from other subjects |
| Andersen 2009      | Effects of acute oral administration of 4 mg salbutamol on exercise performance in non-asthmatic elite athletes                                                                     | skiers cannot be separated from other subjects |
| Anderson 2003      | Responses to bronchial challenge submitted for approval to use inhaled beta(2)-agonists before an event at the 2002 Winter Olympics                                                 | skiers cannot be separated from other subjects |
| Backer 2010        | Not all who wheeze have asthma                                                                                                                                                      | review                                         |
| Bellon 2004        | Asthma among elite athletes                                                                                                                                                         | review                                         |
| Bjermer 1996       | Obstructive symptoms in athletes: is it asthma and what to do about it?                                                                                                             | editorial, commentary, interview               |
| Blume et al. 2018  | Training load, immune status, and clinical outcomes in young athletes: A controlled, prospective, longitudinal study                                                                | skiers cannot be separated from other subjects |
| Bolger 2011        | Effect of inspired air conditions on exercise-induced bronchoconstriction and urinary CC16 levels in athletes.                                                                      | subjects not competitive skiers                |
| Bonini 2015        | Asthma, allergy and the olympics: A 12-year survey in elite athletes                                                                                                                | skiers cannot be separated from other subjects |
| Bonsignore 2007    | Airways inflammation and sport                                                                                                                                                      | review                                         |
| Bordeleau 2013     | Effect Of Ipratropium On Exercise-Induced Cough In Winter Athletes                                                                                                                  | conference abstract                            |
| Bordeleau 2014     | Effects of ipratropium on exercise-induced cough in winter athletes: a hypothesis-generating study.                                                                                 | not asthma                                     |
| Bosco 1998         | Testosterone and cortisol levels in blood of male sprinters, soccer players and cross-country skiers                                                                                | not asthma                                     |
| Bougault 2008      | Airway Hyperresponsiveness (AHR) and Markers of Inflammation or Remodelling in Swimmers and Winter athletes                                                                         | conference abstract                            |
| Bougault 2009      | Asthma, airway inflammation and epithelial damage in swimmers and cold-air athletes.                                                                                                | skiers cannot be separated from other subjects |
| Bougault 2010      | Bronchial challenges and respiratory symptoms in elite swimmers and winter sport athletes: Airway hyperresponsiveness in asthma: its measurement and clinical significance.         | skiers cannot be separated from other subjects |
| Bougault 2010      | Bronchial Challenges and Respiratory Symptoms in Elite Swimmers and Winter Sport Athletes.                                                                                          | skiers cannot be separated from other subjects |
| Boulet 2015        | Asthma and exercise-induced bronchoconstriction in athletes                                                                                                                         | review                                         |
| Boulet et al. 2017 | Athletes Do Not Condition Inspired Air More Effectively than Nonathletes during Hyperpnea                                                                                           | subjects not competitive skiers                |
| Butcher 2006       | Exercise-induced asthma in the competitive cold weather athlete.                                                                                                                    | review                                         |
| Byrne-Quinn 1971   | Ventilatory control in the athlete.                                                                                                                                                 | skiers cannot be separated from other subjects |
| Carlsen 1997       | The effect of inhaled salbutamol and salmeterol on lung function and endurance performance in healthy well-trained athletes                                                         | skiers cannot be separated from other subjects |
| Carlsen 2001       | Can asthma treatment in sports be doping? The effect of the rapid onset, long-acting inhaled beta(2)-agonist formoterol upon endurance performance in healthy well-trained athletes | skiers cannot be separated from other subjects |
| Carlsen 2012       | Sports in extreme conditions: the impact of exercise in cold temperatures on asthma and bronchial hyper-responsiveness in athletes.                                                 | review                                         |
| Carlsen 2012       | Mechanisms of asthma development in elite athletes                                                                                                                                  | not asthma                                     |
| Chalkias 2013      | Airway Remodeling and Cardiac Arrest in Long-Distance Ski Races                                                                                                                     | editorial, commentary, interview               |
| Couillard 2014     | Perception of bronchoconstriction following methacholine and eucapnic voluntary hyperpnea challenges in elite athletes                                                              | skiers cannot be separated from other subjects |

| Author and year             | Title                                                                                                                                                                                | Decision                                       |
|-----------------------------|--------------------------------------------------------------------------------------------------------------------------------------------------------------------------------------|------------------------------------------------|
| Couto 2015                  | Two distinct phenotypes of asthma in elite athletes identified by latent class analysis.                                                                                             | skiers cannot be separated from other subjects |
| Dahlqvist 1992              | Exposure to Ski-Wax Smoke and Health Effects in Ski Waxers                                                                                                                           | subjects not competitive skiers                |
| Derman 2016                 | The incidence and patterns of illness at the Sochi 2014 Winter Paralympic Games: A prospective cohort study of 6564 athlete days                                                     | not asthma                                     |
| Dickinson 2005              | Impact of changes in the IOC-MC asthma criteria: A British perspective                                                                                                               | subjects not competitive skiers                |
| Dickinson 2006              | Screening elite winter athletes for exercise induced asthma: a comparison of three challenge methods.                                                                                | skiers cannot be separated from other subjects |
| Dickinson 2014              | The ergogenic effect of long-term use of high dose salbutamol                                                                                                                        | subjects not competitive skiers                |
| Dickinson et al. 2018       | Nonpharmacologic Strategies to Manage Exercise-Induced Bronchoconstriction                                                                                                           | review                                         |
| Dickinson ym. 2011          | Diagnosis of exercise-induced bronchoconstriction: Eucapnic voluntary hyperpnoea challenges identify previously undiagnosed elite athletes with exercise-induced bronchoconstriction | <b>included in the review</b>                  |
| Doyon 2001                  | Field testing of $\dot{V}O_2$ peak in cross-country skiers with portable breath-by-breath system                                                                                     | equipment validation study                     |
| Driessen 2014               | Exercise-induced airway obstruction in the cold                                                                                                                                      | review                                         |
| Engebretsen 2010            | Sports injuries and illnesses during the winter olympic games 2010                                                                                                                   | not asthma                                     |
| Eriksson et al. 2018        | Prevalence, age at onset, and risk factors of self-reported asthma among Swedish adolescent elite cross-country skiers.                                                              | <b>included in the review</b>                  |
| Evans 2005                  | Cold air inhalation does not affect the severity of EIB after exercise or eucapnic voluntary hyperventilation                                                                        | subjects not competitive skiers                |
| Fitch 2012                  | An overview of asthma and airway hyper-responsiveness in Olympic athletes                                                                                                            | review                                         |
| Freberg 2016                | Pulmonary function and serum pneumoproteins in professional ski waxers                                                                                                               | subjects not competitive skiers                |
| Gonzalez-Millan et al. 2017 | Physiological Demands of Elite Cross-Country Skiing During a Real Competition.                                                                                                       | not asthma                                     |
| Haahtela 2008               | Mechanisms of asthma in Olympic athletes--practical implications.                                                                                                                    | review                                         |
| Heir 1994                   | Longitudinal variations in bronchial responsiveness in cross-country skiers and control subjects                                                                                     | <b>included in the review</b>                  |
| Heir 1994                   | Self-reported asthma and exercise-induced asthma symptoms in high-level competitive cross-country skiers                                                                             | <b>included in the review</b>                  |
| Heir 1995                   | Respiratory tract infection and bronchial responsiveness in elite athletes and sedentary control subjects                                                                            | <b>included in the review</b>                  |
| Heir 1995                   | Salbutamol and high-intensity treadmill running in nonasthmatic highly conditioned athletes                                                                                          | skiers cannot be separated from other subjects |
| Heir 1995                   | The influence of training intensity, airway infections and environmental conditions on seasonal variations in bronchial responsiveness in cross-country skiers                       | <b>included in the review</b>                  |
| Helenius ym. 1998           | Asthma and increased bronchial responsiveness in elite athletes: atopy and sport event as risk factors.                                                                              | subjects not competitive skiers                |
| Hinde 2017                  | The effect of temperature, gradient, and load carriage on oxygen consumption, posture, and gait characteristics                                                                      | subjects not competitive skiers                |
| Hoffman ym. 1997            | Acute effects of ski waxing on pulmonary function.                                                                                                                                   | subjects not competitive skiers                |
| Holmberg ym. 2007           | Lung function, arterial saturation and oxygen uptake in elite cross country skiers: influence of exercise mode                                                                       | not asthma                                     |
| Hoshino 2015                | Effect of inhaled corticosteroids on bronchial asthma in Japanese athletes                                                                                                           | skiers cannot be separated from other subjects |
| Iikura 1977                 | Ski Camp for Asthmatic Children                                                                                                                                                      | subjects not competitive skiers                |
| KARJALAINEN 1995            | NONSPECIFIC BRONCHIAL HYPERREACTIVITY IN SKI ATHLETES IS ASSOCIATED WITH INCREASED TENASCIN EXPRESSION IN THE BRONCHIAL BASEMENT-MEMBRANE ZONE                                       | conference abstract                            |
| Karjalainen ym. 2000        | Evidence of airway inflammation and remodeling in ski athletes with and without bronchial hyperresponsiveness to methacholine.                                                       | <b>included in the review</b>                  |
| Kennedy 2016                | Airway inflammation, cough and athlete quality of life in elite female cross-country skiers: A longitudinal study                                                                    | <b>included in the review</b>                  |
| Kennedy et al. 2018         | Respiratory function and symptoms post cold air exercise in female high and low ventilation sport athletes                                                                           | skiers cannot be separated from other subjects |
| Kippelen 2012               | Respiratory health of elite athletes - preventing airway injury: a critical review.                                                                                                  | review                                         |

| Author and year          | Title                                                                                                                                              | Decision                                                                     |
|--------------------------|----------------------------------------------------------------------------------------------------------------------------------------------------|------------------------------------------------------------------------------|
| Knopfli ym. 1992         | [Acute deterioration of the CO diffusion capacity following exposure to ski-wax vapors].                                                           | not asthma                                                                   |
| Koskela 2007             | Cold air-provoked respiratory symptoms: The mechanisms and management                                                                              | review                                                                       |
| Kotaniemi 2003           | Does living in a cold climate or recreational skiing increase the risk for obstructive respiratory diseases or symptoms?                           | subjects not competitive skiers                                              |
| Kujala ym. 1996          | Asthma and other pulmonary diseases in former elite athletes.                                                                                      | subjects not competitive skiers                                              |
| Laitinen 1994            | [Ski racing and asthma].                                                                                                                           | editorial, commentary, interview                                             |
| Langdeau 2004            | Comparative prevalence of asthma in different groups of athletes: a survey.                                                                        | <b>included in the review</b>                                                |
| Larsson 1993             | [Does competitive skiing cause asthma? Cold air is suspected to be the primary cause. Interview by Birgit Wilhelmson].                             | editorial, commentary, interview                                             |
| Larsson 1993             | High prevalence of asthma in cross country skiers.                                                                                                 | <b>included in the review</b>                                                |
| Larsson 1994             | Self-reported obstructive airway symptoms are common in young cross-country skiers                                                                 | <b>included in the review</b>                                                |
| Larsson 1997             | Influence of a beta2-agonist on physical performance at low temperature in elite athletes.                                                         | skiers cannot be separated from other subjects                               |
| Larsson 1998             | Inhalation of cold air increases the number of inflammatory cells in the lungs in healthy subjects.                                                | subjects not competitive skiers                                              |
| Larsson and Larsson 1994 | [Better results in sports after use of anti-asthmatic drugs?].                                                                                     | editorial, commentary, interview                                             |
| Lazovic 2015             | Respiratory adaptations in different types of sport                                                                                                | subjects not competitive skiers                                              |
| Lereim 1993              | [Sports in cold climate].                                                                                                                          | editorial, commentary, interview                                             |
| Lund 2009                | Prevalence of asthma-like symptoms, asthma and its treatment in elite athletes                                                                     | subjects not competitive skiers                                              |
| Maiolo 2004              | Prevalence of asthma and atopy in Italian Olympic athletes                                                                                         | subjects not competitive skiers                                              |
| Martinović 2014          | Oxidative stress status in female athletes with an IgE-dependent allergic response                                                                 | subjects not competitive skiers                                              |
| Michalak 2002            | Prevalence of asthma in athletes, influence of sport and environmental exposure                                                                    | <b>included in the review</b>                                                |
| Millward 2009            | The diagnosis of asthma and exercise-induced bronchospasm in division i athletes                                                                   | subjects not competitive skiers                                              |
| Mohammadzadeh 2013       | The effect of high intensity interval exercise in high/low temperatures on exercise-induced bronchoconstriction (EIB) in trained adolescent males  | subjects not competitive skiers                                              |
| Molphy et al. 2017       | The effect of 400 µg inhaled salbutamol on 3 km time trial performance in a low humidity environment                                               | subjects not competitive skiers                                              |
| Mueller 2001             | Immunological effects of competitive versus recreational sports in cross-country skiing                                                            | not asthma                                                                   |
| Muller 1997              | Exercise prescription in cross country skiing for patients with asthma bronchiale                                                                  | subjects not competitive skiers                                              |
| Niemelä 2015             | Clinical and Laboratory Responses of Cross-Country Skiing for a 24-H World Record: Case Report.                                                    | not asthma                                                                   |
| Nikitina 2013            | Exercise-induced bronchoconstriction (EIB) in different periods of training in winter sports athletes, relationship with respiratory NO production | conference abstract                                                          |
| Nikitina 2014            | Efficacy of antileukotriene therapy in exercise-induced bronchospasm in skiers and biathlons                                                       | <b>included in the review (eventually excluded due to high risk of bias)</b> |
| Nikitina ym. 2013        | The interaction between respiratory function and exhaled nitric oxide in exercise-induced bronchoconstriction in sportsmen                         | <b>included in the review (eventually excluded due to high risk of bias)</b> |
| Norqvist 2015            | Self-reported physician-diagnosed asthma among Swedish adolescent, adult and former elite endurance athletes.                                      | <b>included in the review</b>                                                |
| Nystad ym. 2000          | Asthma and wheezing among Norwegian elite athletes                                                                                                 | skiers cannot be separated from other subjects                               |
| Ogston and Butcher 2002  | A sport-specific protocol for diagnosing exercise-induced asthma in cross-country skiers.                                                          | <b>included in the review</b>                                                |
| Oldridge 1981            | Cross-country skiing: Precautions for cardiac patients                                                                                             | not asthma                                                                   |
| Passàli 2004             | Alterations in rhinosinusal homeostasis in a sportive population: Our experience with 106 athletes                                                 | not asthma                                                                   |
| Petruson 1993            | [Facilitate nose breathing during skiing].                                                                                                         | editorial, commentary, interview                                             |
| Pirilä ym. 2000          | Nasal function of skiers in cold weather.                                                                                                          | not asthma                                                                   |
| Pluim ym. 2011           | beta(2)-Agonists and Physical Performance A Systematic Review and Meta-Analysis of Randomized Controlled Trials                                    | review                                                                       |
| Pohjantähti ym. 2005     | Exercise-induced bronchospasm among healthy elite cross country skiers and non-athletic students                                                   | <b>included in the review</b>                                                |
| Pollard and Pollard 1994 | Asthma in cross country skiers.                                                                                                                    | editorial, commentary, interview                                             |

| Author and year           | Title                                                                                                                                                                                   | Decision                                       |
|---------------------------|-----------------------------------------------------------------------------------------------------------------------------------------------------------------------------------------|------------------------------------------------|
| Price 2016                | The role of impulse oscillometry in detecting airway dysfunction in athletes                                                                                                            | subjects not competitive skiers                |
| Rundell 2000              | Exercise-induced asthma screening of elite athletes: field versus laboratory exercise challenge.                                                                                        | skiers cannot be separated from other subjects |
| Rundell 2001              | Self-reported symptoms and exercise-induced asthma in the elite athlete.                                                                                                                | <b>included in the review</b>                  |
| Rundell 2003              | Bronchoconstriction during cross-country skiing: is there really a refractory period?                                                                                                   | skiers cannot be separated from other subjects |
| Rundell 2004              | Field exercise vs laboratory eucapnic voluntary hyperventilation to identify airway hyperresponsiveness in elite cold weather athletes.                                                 | skiers cannot be separated from other subjects |
| Rundell 2006              | COMMENTARY.                                                                                                                                                                             | editorial, commentary, interview               |
| Rundell et al. 2018       | Exercise-Induced Bronchoconstriction and the Air We Breathe.                                                                                                                            | review                                         |
| Sandsund 1998             | Effect of cold exposure (-15degreeC) and Salbutamol treatment on physical performance in elite nonasthmatic cross-country skiers                                                        | <b>included in the review</b>                  |
| Sandsund 2000             | Treatment with inhaled beta(2)-agonists or oral leukotriene antagonist do not enhance physical performance in nonasthmatic highly trained athletes exposed to -15 degrees C             | subjects not competitive skiers                |
| Sandsund 2001             | Self-reported asthma and exercise-induced respiratory symptoms related to environmental conditions in marathon runners and cross-country skiers                                         | subjects not competitive skiers                |
| Selge ym. 2016            | Asthma prevalence in German Olympic athletes: A comparison of winter and summer sport disciplines                                                                                       | skiers cannot be separated from other subjects |
| Shephard 2004             | Does cold air damage the lungs of winter athletes?                                                                                                                                      | review                                         |
| SILVERS 1988              | The skier's nose: A randomized, double-blind placebo controlled study of ipratropium bromide (AtroventR MDI) administered intranasally for the prevention of cold-induced rhinorrhea    | not asthma                                     |
| Smith 1994                | Untitled.                                                                                                                                                                               | editorial, commentary, interview               |
| Smith 2002                | Prevalence of obstructive airflow limitation in Irish collegiate athletes                                                                                                               | subjects not competitive skiers                |
| Soligard 2015             | Sports injuries and illnesses in the Sochi 2014 Olympic Winter Games                                                                                                                    | not asthma                                     |
| Spiering ym. 2004         | An evaluation of standardizing target ventilation for eucapnic voluntary hyperventilation using FEV1                                                                                    | subjects not competitive skiers                |
| Stang 2013                | Increased Parasympathetic Tone and Bronchial Hyperresponsiveness In Elite Winter Sport Athletes                                                                                         | conference abstract                            |
| Stang 2015                | Increased bronchial parasympathetic tone in elite cross-country and biathlon skiers: a randomised crossover study.                                                                      | withdrawn                                      |
| Stang et al. 2018         | The Role of Airway Inflammation and Bronchial Hyperresponsiveness in Athlete's Asthma.                                                                                                  | <b>included in the review</b>                  |
| Stang ym. 2016            | Parasympathetic Activity and Bronchial Hyperresponsiveness in Athletes.                                                                                                                 | not asthma                                     |
| Steffen 2017              | Sports injuries and illnesses in the Lillehammer 2016 Youth Olympic Winter Games                                                                                                        | not asthma                                     |
| Stenfors 2010             | Self-reported symptoms and bronchial hyperresponsiveness in elite cross-country skiers.                                                                                                 | <b>included in the review</b>                  |
| Stenfors and Sue-Chu 2008 | A comparison of inhaled mannitol, metacholine provocation and eucapnic voluntary hyperventilation as diagnostic tests for exercised induced bronchoconstriction in cross country skiers | conference abstract                            |
| Stensrud 2007             | Bronchial hyperresponsiveness in skiers: field test versus methacholine provocation?                                                                                                    | <b>included in the review</b>                  |
| Stensrud 2007             | Exercise capacity and exercise-induced bronchoconstriction (EIB) in a cold environment                                                                                                  | subjects not competitive skiers                |
| Sue-Chu 1996              | Prevalence of asthma in young cross-country skiers in central Scandinavia: Differences between Norway and Sweden                                                                        | <b>included in the review</b>                  |
| Sue-Chu 1999              | Bronchoscopy and bronchoalveolar lavage findings in cross-country skiers with and without "ski asthma".                                                                                 | <b>included in the review</b>                  |
| Sue-Chu 2000              | Placebo-controlled study of inhaled budesonide on indices of airway inflammation in bronchoalveolar lavage fluid and bronchial biopsies in cross-country skiers.                        | <b>included in the review</b>                  |
| Sue-Chu 2012              | Winter sports athletes: long-term effects of cold air exposure.                                                                                                                         | review                                         |
| Sue-Chu ym. 1998          | Lymphoid aggregates in endobronchial biopsies from young elite cross-country skiers.                                                                                                    | <b>included in the review</b>                  |
| Sue-Chu ym. 1999          | Non-invasive evaluation of lower airway inflammation in hyper-responsive elite cross-country skiers and asthmatics.                                                                     | <b>included in the review</b>                  |

| Author and year      | Title                                                                                                                                                                      | Decision                                       |
|----------------------|----------------------------------------------------------------------------------------------------------------------------------------------------------------------------|------------------------------------------------|
| Sue-Chu ym. 1999     | Salmeterol and physical performance at -15 degrees C in highly trained nonasthmatic cross-country skiers.                                                                  | <b>included in the review</b>                  |
| Sue-Chu ym. 2000     | Montelukast does not affect exercise performance at subfreezing temperature in highly trained non-asthmatic endurance athletes.                                            | skiers cannot be separated from other subjects |
| Sue-Chu ym. 2010     | Airway hyperresponsiveness to methacholine, adenosine 5-monophosphate, mannitol, eucapnic voluntary hyperpnoea and field exercise challenge in elite cross-country skiers. | <b>included in the review</b>                  |
| Svendsen 2016        | Training-related and competition-related risk factors for respiratory tract and gastrointestinal infections in elite cross-country skiers                                  | not asthma                                     |
| Thomas 2010          | Self-reported asthma and allergies in top athletes compared to the general population - results of the German part of the GA2LEN-Olympic study 2008.                       | subjects not competitive skiers                |
| Tjorhom 2007         | Effects of formoterol on endurance performance in athletes at an ambient temperature of -20 degrees C                                                                      | subjects not competitive skiers                |
| Tjorhom 2007         | Effects of formoterol on endurance performance in athletes at an ambient temperature of -20°C                                                                              | not asthma                                     |
| Tkachenko ym. 1986   | [Typological characteristics of the physiological reactions to physical loading in highly trained biathlon athletes].                                                      | not asthma                                     |
| Tornling 1996        | Work at low temperature induces inflammation in the lower airways                                                                                                          | conference abstract                            |
| Tsukioka et al. 2017 | Phenotypic analysis of asthma in Japanese athletes                                                                                                                         | skiers cannot be separated from other subjects |
| Tucker 1957          | The hazards of winter sports.                                                                                                                                              | not asthma                                     |
| Turcotte 2003        | Are questionnaires on respiratory symptoms reliable predictors of airway hyperresponsiveness in athletes and sedentary subjects?                                           | skiers cannot be separated from other subjects |
| Turmel 2012          | Cardiorespiratory Screening in Elite Endurance Sports Athletes: The Quebec Study                                                                                           | <b>included in the review</b>                  |
| Turmel ym. 2012      | Seasonal variations of cough reflex sensitivity in elite athletes training in cold air environment                                                                         | not asthma                                     |
| Vakali et al. 2017   | Exercise-induced bronchoconstriction among athletes: Assessment of bronchial provocation tests                                                                             | subjects not competitive skiers                |
| Verges ym. 2004      | A 10-year follow-up study of pulmonary function in symptomatic elite cross-country skiers— athletes and bronchial dysfunctions.                                            | <b>included in the review</b>                  |
| Watts 1993           | Physiological responses to specific maximal exercise tests for cross-country skiing.                                                                                       | not asthma                                     |
| Weiler ym. 2000      | Asthma in United States olympic athletes who participated in the 1998 olympic winter games.                                                                                | skiers cannot be separated from other subjects |
| Weiler ym. 2016      | Exercise-induced bronchoconstriction update-2016                                                                                                                           | review                                         |
| Wiggen 2013          | Effect of cold conditions on double poling sprint performance of well-trained male cross-country skiers.                                                                   | not asthma                                     |
| Wilber ym. 2000      | Incidence of exercise-induced bronchospasm in Olympic winter sport athletes.                                                                                               | <b>included in the review</b>                  |
| Zebrowska 2015       | Endurance training and the risk of bronchial asthma in female cross-country skiers.                                                                                        | <b>included in the review</b>                  |
| Hyrkäs-Palmu 2018    | Cold weather increases respiratory symptoms and functional disability especially among patients with asthma and allergic rhinitis                                          | subjects not competitive skiers                |
| Kennedy 2018         | Respiratory function and symptoms post cold air exercise in female high and low ventilation sport athletes                                                                 | subjects not competitive skiers                |
| Kurowski 2018        | Serum but not exhaled breath condensate periostin level is increased in competitive athletes                                                                               | subjects not competitive skiers                |
| Näsman 2018          | Asthma and Asthma Medication Are Common among Recreational Athletes Participating in Endurance Sport Competitions                                                          | subjects not competitive skiers                |
| Persson 2018         | Asthma Control and Asthma Medication Use among Swedish Elite Endurance Athletes.                                                                                           | skiers cannot be separated from other subjects |
| Skrgat 2018          | Systemic and airway oxidative stress in competitive swimmers                                                                                                               | subjects not competitive skiers                |
| Tschernig 2018       | Isolated aggregates of lymphoid cells in the inner bronchial wall in asthma patients                                                                                       | subjects not competitive skiers                |
| Chernyak et al. 2019 | Lung function in athletes involved in skiing and speed skating                                                                                                             | not asthma                                     |
| Kennedy et al. 2019  | Cold air exercise screening for exercise induced bronchoconstriction in cold weather athletes.                                                                             | skiers cannot be separated from other subjects |
| O'Neill et al. 2019  | Asthma prevalence and control levels among Special Olympics athletes, and asthma-related knowledge of their coaches                                                        | skiers cannot be separated from other subjects |
